# Supplementary material
Source: PubMed Central journal article supplement (PMC4338528)
Supplement: NIHMS60896-supplement-1.pdf [file NIHMS60896-supplement-1.pdf]

# Sensitivity and specificity of the Hyperdense Artery Sign for arterial obstruction in acute ischemic stroke

Dr Grant Mair (MB ChB)<sup>1</sup>  
Dr Elena V Boyd (MBBS)<sup>2</sup>  
Dr Francesca M Chappell (PhD)<sup>1</sup>  
Prof Rüdiger von Kummer (Prof.Dr.med.)<sup>3</sup>  
Prof Richard I Lindley (MD)<sup>4</sup>  
Prof Peter Sandercock (DM)<sup>1</sup>  
Prof Joanna M Wardlaw (MD)<sup>1</sup> and the  
IST-3 Collaborative Group<sup>5,6</sup>

1. Division of Neuroimaging Sciences, University of Edinburgh, Western General Hospital, Edinburgh, UK
2. Department of Radiology, Northwick Park Hospital, Harrow, UK
3. Department of Neuroradiology, Dresden University Stroke Centre, University Hospital, Dresden, Germany
4. Westmead Hospital Clinical School and The George Institute for Global Health, University of Sydney, Australia
5. IST-3 Principal Investigators who contributed imaging for these analyses are listed in online Appendix I.
6. The complete IST-3 Collaborative Group is listed in online Appendix II.

**Corresponding Author:**

Professor Joanna M Wardlaw  
Division of Neuroimaging Sciences  
University of Edinburgh  
Western General Hospital  
Crewe Road  
Edinburgh  
EH4 2XU  
UK

**Email:** joanna.wardlaw@ed.ac.uk  
**Phone:** +44 131 537 2943  
**Fax:** +44 131 332 5150

## CONTENTS

|                      |                                                                          |        |
|----------------------|--------------------------------------------------------------------------|--------|
| <b>Table I.</b>      | Search strategy                                                          | Page 1 |
| <b>Table II.</b>     | Quality assessment checklist                                             | Page 2 |
| <b>Table III.</b>    | Baseline characteristics for IST-3 patients with and without angiography | Page 3 |
| <b>Figure I.</b>     | Flow chart for systematic review                                         | Page 4 |
| <b>Appendix I.</b>   | IST-3 investigators who contributed imaging for these analyses           | Page 5 |
| <b>Appendix II.</b>  | IST-3 collaborative group                                                | Page 6 |
| <b>Appendix III.</b> | Funding sources for IST-3                                                | Page 9 |

**Table I.** Strategy employed on combined Embase and Medline database search

|           |                                                                                      |
|-----------|--------------------------------------------------------------------------------------|
| <b>1</b>  | hyperdens*.mp. [mp=ti, ab, ot, nm, hw, kf, ps, rs, ui, an, sh, tn, dm, mf, dv, kw]   |
| <b>2</b>  | hyper-dens*.mp. [mp=ti, ab, ot, nm, hw, kf, ps, rs, ui, an, sh, tn, dm, mf, dv, kw]  |
| <b>3</b>  | hyperatten*.mp. [mp=ti, ab, ot, nm, hw, kf, ps, rs, ui, an, sh, tn, dm, mf, dv, kw]  |
| <b>4</b>  | hyper-atten*.mp. [mp=ti, ab, ot, nm, hw, kf, ps, rs, ui, an, sh, tn, dm, mf, dv, kw] |
| <b>5</b>  | 1 or 2 or 3 or 4                                                                     |
| <b>6</b>  | arter*.mp. [mp=ti, ab, ot, nm, hw, kf, ps, rs, ui, an, sh, tn, dm, mf, dv, kw]       |
| <b>7</b>  | vessel*.mp. [mp=ti, ab, ot, nm, hw, kf, ps, rs, ui, an, sh, tn, dm, mf, dv, kw]      |
| <b>8</b>  | vascula*.mp. [mp=ti, ab, ot, nm, hw, kf, ps, rs, ui, an, sh, tn, dm, mf, dv, kw]     |
| <b>9</b>  | 6 or 7 or 8                                                                          |
| <b>10</b> | 5 and 9                                                                              |
| <b>11</b> | hmcas.mp. [mp=ti, ab, ot, nm, hw, kf, ps, rs, ui, an, sh, tn, dm, mf, dv, kw]        |
| <b>12</b> | 10 or 11                                                                             |
| <b>13</b> | angiogra*.mp. [mp=ti, ab, ot, nm, hw, kf, ps, rs, ui, an, sh, tn, dm, mf, dv, kw]    |
| <b>14</b> | arteriogra*.mp. [mp=ti, ab, ot, nm, hw, kf, ps, rs, ui, an, sh, tn, dm, mf, dv, kw]  |
| <b>15</b> | cta.mp. [mp=ti, ab, ot, nm, hw, kf, ps, rs, ui, an, sh, tn, dm, mf, dv, kw]          |
| <b>16</b> | mra.mp. [mp=ti, ab, ot, nm, hw, kf, ps, rs, ui, an, sh, tn, dm, mf, dv, kw]          |
| <b>17</b> | 13 or 14 or 15 or 16                                                                 |
| <b>18</b> | 12 and 17                                                                            |

Keywords pertaining to hyperdense arteries (in any location) and angiography were combined using the Boolean operator OR, results from these topic area searches were then combined using the Boolean operator AND.

**Table II.** Quality assessment checklist used as secondary exclusion criteria for entry into meta-analysis. All essential criteria had to be met

| <b>Essential</b>                         | <b>Desirable</b>                                                                                                                                                                                          |
|------------------------------------------|-----------------------------------------------------------------------------------------------------------------------------------------------------------------------------------------------------------|
| Description of patient selection process | Prospective with sequential patients<br>Randomized<br>Inclusion/exclusion criteria provided                                                                                                               |
| Image acquisition details provided       | Scanner used (manufacturer and model, number of detector rows)<br>Scan parameters (especially slice thickness)<br>Time from stroke onset to imaging<br>Time from non-contrast CT to angiography           |
| Description of image analysis            | Details of those analysing images<br>Blinded to clinical details and treatment allocation (if any)<br>Reproducibility data provided<br>Hyperdense Artery Sign defined using previously described criteria |

**Table III.** Baseline clinical and imaging characteristics and six-month outcome for IST-3 patients with and without pre-randomization angiography

|                                              | <b>IST-3 Patients with<br/>Baseline CT or MR<br/>Angiography<br/>n = 273</b> | <b>Entire<br/>IST-3 Group<br/>n=3035</b> | <b>p-value<br/>for<br/>Difference</b> |
|----------------------------------------------|------------------------------------------------------------------------------|------------------------------------------|---------------------------------------|
| <b>Age</b> (median, IQR)                     | 81 years (71-86)                                                             | 81 years (72-86)                         | 0.815                                 |
| <b>Male Sex</b>                              | 120 (44.0%)                                                                  | 1465 (48.3%)                             | 0.135                                 |
| <b>NIHSS</b> (median, IQR)                   | 10 (5-17)                                                                    | 11 (6-17)                                | 0.020                                 |
| <b>Hyperdense Artery</b>                     | 69 (25.3%)                                                                   | 716/2961<br>(24.2%)*                     | 0.687                                 |
| <b>OHS</b> (median, IQR)                     | 3 (1-5)                                                                      | 4 (2-6)                                  | 0.002                                 |
| <b>Independent at 6<br/>Months</b> (OHS 0-2) | 120 (44.0%)                                                                  | 1088 (35.8%)                             | 0.003                                 |
| <b>Dead by 6 Months</b>                      | 61 (22.3%)                                                                   | 815 (26.9%)                              | 0.078                                 |
| <b>Treated with rt-PA</b>                    | 138 (50.5%)                                                                  | 1515 (49.9%)                             | 0.827                                 |

Results represent n (%) unless otherwise stated.

NIHSS = National Institutes of Health Stroke Scale. OHS = Oxford Handicap Scale (six-month follow up). IQR = Inter-Quartile Range.

\* From the entire IST-3 group 2961 had non-contrast CT at baseline, the remainder received MRI.

**Figure 1.** Flowchart showing results of systematic search and effect of exclusion criteria on final number of articles included in meta-analysis

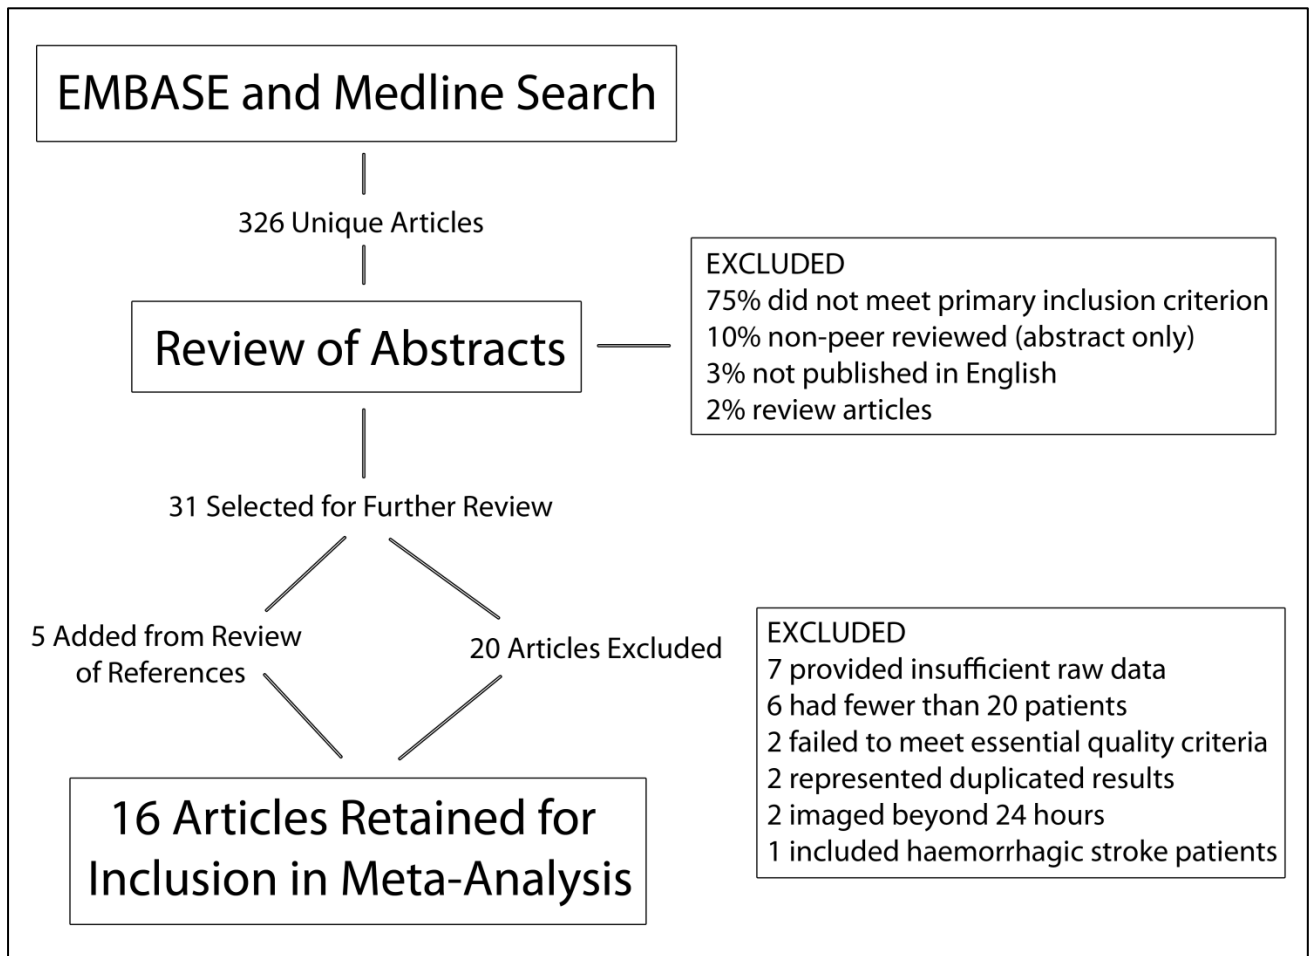

## **Appendix I. IST-3 investigators who contributed imaging for these analyses**

From their respective centres (n):

Prof Martin Brown, The National Hospital for Neurology & Neurosurgery, London, UK (67);  
Prof Anna Czlonkowska, Institute of Psychiatry & Neurology, Warsaw, Poland (29);  
Dr Erik Lundstrom, Uppsala University Hospital, Sweden (24);  
Prof Philippe Lyrer, Universitatsspital Basel, Switzerland (18);  
Dr C Levi, John Hunter Hospital, New Lambton Heights, Australia (14);  
Dr C Roffe, University Hospital of North Staffordshire, Stoke-on-Trent, UK (12);  
Dr J Sturm, Gosford Hospital, Australia (12);  
Dr Gaetano Procaccianti, Ospedale Maggiore, Bologna, Italy (11);  
Dr SH Johnsen, University Hospital North Norway, Tromsø, Norway (10);  
Dr Magnus Esbjornsson, Hassleholm Hospital, Sweden (10);  
Dr B Indredavik, University Hospital Trondheim, Norway (9);  
Dr Federica Casoni, Nuovo Ospedale Civile "S.Agostino-Estense", Modena, Italy (9);  
Dr David Hargroves, William Harvey Hospital, Ashford, UK (7);  
Dr Pankaj Sharma, Hammersmith Hospitals & Imperial College, London, UK (7);  
Prof Peter Sandercock, Western General Hospital, Edinburgh, UK (5);  
Dr Y Ronning, Ullevål Sykehus, Oslo, Norway (3);  
Dr Andre Peeters, Cliniques Universitaires St Luc, Brussels, Belgium (3);  
Dr Patrick Gompertz, Royal London Hospital, UK (3);  
Prof Chris Bladin, Box Hill Hospital, Australia (3);  
Dr E Warburton, Addenbrookes Hospital, Cambridge, UK (2);  
Dr Stephen Read, Royal Brisbane and Women's Hospital, Herston, Australia (2);  
Dr Fabio Chiodo Grandi, Ospedale di Cattinara Trieste, Italy (1);  
Prof G Hankey, Royal Perth Hospital, Australia (1);  
Prof Lalit Kalra, King's College Hospital, London, UK (1);  
Dr GJ Gunathilagan, Queen Elizabeth The Queen Mother Hospital, Kent, UK (1);  
Dr A Rudd, Guy's & St.Thomas Hospital, London, UK (1);  
Prof Walenty M. Nyka, Medical University of Gdansk, Poland (1);  
Dr Odd Roe Skogen, Alesund Sjukehus, Norway (1);  
Prof Per Wester, University Hospital of Northern Sweden, Umeå, Sweden (1);  
Prof Carlo Gandolfo, Università degli Studi di Genova, Italy (1);  
Dr Paul Guyler, Southend University Hospital, Westcliff-on-Sea, UK (1);  
Dr Nicoletta Checcarelli, Ospedale Valduce di Como, Italy (1);  
Dr David Nicholl, City Hospital, Sandwell & West Birmingham Hospital, Birmingham, UK (1);  
Prof Andreas Luft, Universitätsspital Zürich, Switzerland (1).

## **Appendix II. IST-3 Collaborative Group**

For a complete list of all committees, please see the IST-3 primary publication in *The Lancet* (The benefits and harms of intravenous thrombolysis with recombinant tissue plasminogen activator within 6 h of acute ischaemic stroke (the third international stroke trial [IST-3]): a randomized controlled trial. *Lancet* 2012;379:2352-63).

IST-3 was conceived by the co-chief investigators, Peter Sandercock (University of Edinburgh, Scotland), Richard I Lindley (Sydney Medical School – Westmead Hospital and The George Institute for Global Health, University of Sydney, Australia), and Joanna M Wardlaw (University of Edinburgh, Scotland).

### **Non-contrast CT and MRI reading panel**

Joanna M Wardlaw, Andrew Farrall (University of Edinburgh, Scotland), Zoe Morris (University of Edinburgh, Scotland), Rüdiger von Kummer (Dresden University Stroke Centre, Germany), Lesley Cala (University of Western Australia, Crawley, Australia), Anders von Heijne (Dandyred Hospital, Stockholm, Sweden), Alessandro Adami (Sacro Cuore-Don Calabria Hospital, Verona, Italy), Andre Peeters (Cliniques Universitaires Saint-Luc, Bruxelles, Belgium), Gillian Potter (Salford Royal NHS Foundation Trust, England), Nick Brady (Neuroradiology, James Cook University Hospital, South Tees Hospital NHS Trust, Middlesbrough, UK).

### **Angiography reading panel**

Joanna M Wardlaw, Rüdiger von Kummer, Andrew Farrall, Robin Sellar (University of Edinburgh, Scotland), Alessandro Adami, Philip White (Newcastle University, UK), Andrew Demchuk (University of Calgary, Canada), Matthew Adams (Great Ormond Street Hospital, London, UK), Grant Mair (University of Edinburgh, Scotland), Bernard Yan (The Royal Melbourne Hospital, Parkville, Australia).

### **Trial steering committee**

Independent chairmen: Colin Baigent (University of Oxford, UK); David Chadwick (University of Liverpool, UK). Independent member: Pippa Tyrrell (University of Manchester, UK); Gordon Lowe (University of Glasgow, UK). Co-principal investigators: PS; RIL. Chief investigator for Neuroradiology: JMW; Martin Dennis (University of Edinburgh, Scotland). Statistician: Geoff Cohen (University of Edinburgh, Scotland). Trial Co-ordinator: Karen Innes (University of Edinburgh, Scotland). Lay representative: Heather Goodare.

### **National coordinators and associate national coordinators**

Australia: RIL, Graeme J Hankey (Royal Perth Hospital, Perth). Austria: Karl Matz (Landesklinikum Donauregion Tulln, Tulln), Michael Brainin. Belgium: AP. Canada: Gord Gubitz (Dalhousie University and Queen Elizabeth II Health Sciences Centre, Halifax), Stephen J Phillips (Dalhousie University and Queen Elizabeth II Health Sciences Centre, Halifax). Italy: Stefano Ricci (Department of Neurology ASL1, Ospedale, Citta' di Castello). Mexico: Antonio Arauz (Instituto Nacional de Neurologia, Mexico City). Norway: Eivind Berge (Oslo University Hospital, Oslo), Karsten Bruins Slot (Oslo University Hospital, Oslo). Poland: Anna Czlonkowska (Institute of Psychiatry and Neurology, Warsaw, and Medical University of Warsaw, Warsaw), Adam Kobayashi (Institute of Psychiatry and Neurology,



Warsaw, Poland). Portugal: Manuel Correia (Hospital Geral de Santo Antonio, Porto). Switzerland: Phillippe Lyrer (University Hospital Basel, Basel,), Stefan Engelter. Sweden: Veronica Murray (Karolinska Institutet, Stockholm), Andreas Terent, Bo Norrving, Per Wester: UK: Graham Venables (Sheffield Teaching Hospitals NHS Foundation Trust, Sheffield, UK).

### **Centres in IST-3 that performed angiography**

#### **AUSTRALIA**

Austin Health - Repatriation Campus  
Box Hill Hospital (Monash University)  
Gosford Hospital  
John Hunter Hospital  
Nambour General Hospital  
Royal Brisbane and Women's Hospital  
Royal Perth Hospital

Prof Helen Dewey  
Prof Chris Bladin  
Dr Jonathan Sturm  
Dr Chris Levi  
Dr Rohan Grimley  
Dr Stephen Read  
Dr Graeme J. Hankey

#### **AUSTRIA**

Landeskrankenhaus Donauregion Tulln

Dr Karl Matz

#### **BELGIUM**

Cliniques Universitaires St. Luc

Dr Andre Peeters

#### **CANADA**

QEH Health Sciences Centre

Dr Gord Gubitza

#### **ITALY**

Nuovo Ospedale Civile  
Ospedale Citta di Castello  
Ospedale di Branca (Ospedale di Gubbio)  
Ospedale di Cattinara - Trieste  
Ospedale Maggiore  
Ospedale Valduce di Como  
Universita degli Studi di Genova, Dipartimento di Neuroscienze Oftalmologia e Genetica  
Prof Carlo Gandolfo

Dr Federica Casoni  
Dr Silvia Cenciarelli  
Dr Tatiana Mazzoli  
Dr Fabio Chiodo Grandi  
Dr Gaetano Procaccianti  
Dr Nicoletta Checcarelli  
Prof Carlo Gandolfo

#### **NORWAY**

Aalesund Sjukehus  
Harstad Sykehus  
St Olavs Hospital, University Hospital of Trondheim  
Ullevål University Hospital  
University Hospital Northern Norway

Dr Yngve Müller Seljeseth  
Dr Odd Kildahl-Andersen  
Dr Bent Indredavik  
Dr Eivind Berge  
Dr Stein Harald Johnsen

#### **POLAND**

2nd Department of Neurology,  
Institute of Psychiatry & Neurology, Medical University of Gdansk

Prof Anna Czlonkowska

Prof Walenty Michal Nyka, Dr Dariusz Gasecki

Military Medical Institute SPZZOZ w Sandomierzu Prof A Stepien, Dr Piotr Sobolewski

## **PORTUGAL**

Centro Hospitalar de Trás-os-Montes e Alto Douro

Dr Mário Silva

## **SWEDEN**

Danderyds Sjukhus

Hassleholm Hospital

University Hospital of Northern Sweden

Uppsala University Hospital

Dr Veronica Murray

Dr Magnus Esbjornsson

Prof Per Wester

Dr Erik Lundström

## **SWITZERLAND**

Universitätsspital Basel

Universitätsspital Zürich

Prof Philippe Lyrer

Prof Andreas Luft

## **UNITED KINGDOM**

Addenbrookes Hospital

City Hospital, Sandwell & West Birmingham Hospitals NHS Trust

Countess of Chester Hospital

Guy's & St.Thomas' Hospital

Hammersmith Hospitals & Imperial College

King's College Hospital

Leeds General Infirmary

Norfolk and Norwich University Hospital NHS Trust

Nottingham City Hospital

Queen Elizabeth the Queen Mother Hospital

Queen's Hospital, Barking, Havering & Redbridge Hospitals NHS Trust

Royal Hallamshire Hospital

Southend University Hospital

St George's Healthcare NHS Trust

The National Hospital for Neurology & Neurosurgery

The Royal London Hospital, Barts and The London NHS Trust

University Hospital Aintree

University Hospital of North Staffordshire

University Hospitals Coventry & Warwickshire NHS Trust

Western General Hospital

William Harvey Hospital

Dr Liz Warburton

Dr David Nicholl

Dr K Chatterjee

Prof Anthony Rudd

Dr Pankaj Sharma

Professor Lalit Kalra

Dr Ahamad Hassan

Dr Kneale Metcalf

Dr Wayne Sunman

Dr Gunaratnam Gunathilagan

Dr Khaled Darawil

Prof Graham Venables

Dr Paul Guyler

Dr Geoffrey Cloud

Prof Martin Brown

Dr Patrick Gompertz

Dr Ramesh Durairaj

Prof Christine Roffe

Dr Anthony Kenton

Prof Peter Sandercock

Dr David Hargroves

### **Appendix III. Funding sources for IST-3**

The start-up phase of IST-3 was supported by a grant from the Stroke Association, UK (TSA 04/99). The expansion phase was funded by the Health Foundation UK (2268/1282). The scan reading development was funded by Chest, Heart Stroke Scotland (R100/7).

The main phase of the trial is *funded by: UK Medical Research Council (MRC) (grant numbers G0400069 and EME 09-800-15) and managed by NIHR on behalf of the MRC-NIHR partnership; the Research Council of Norway; Arbetsmarknadens Partners Forsakringsbolag (AFA) Insurances Sweden; the Swedish Heart Lung Fund; The Foundation of Marianne and Marcus Wallenberg, Stockholm County Council; Karolinska Institute Joint ALF-project grants Sweden, the Polish Ministry of Science and Education (grant number 2PO5B10928); the Australian Heart Foundation; Australian National Health and Medical Research Council (NHMRC); the Swiss National Research Foundation; the Swiss Heart Foundation; the Foundation for Health and Cardio-/Neurovascular Research, Basel, Switzerland; the Assessorato alla Sanita, Regione dell'Umbria, Italy; and, Danube University, Krems, Austria.*

Boehringer-Ingelheim GmbH donated drug and placebo for the 300 patients in the double-blind phase, but thereafter had no role whatsoever in the trial.

The UK Stroke Research Network (SRN study ID 2135) adopted the trial in 01/05/2006, supported the initiation of new UK sites, and in some centres, and, after that date, data collection was undertaken by staff funded by the network or working for associated NHS organisations.

IST-3 gratefully acknowledges the extensive support of the NIHR Stroke Research Network, NHS Research Scotland (NRS), through the Scottish Stroke Research Network, and the National Institute for Social Care and Health Research Clinical Research Centre (NISCHR CRC).

The central imaging work was undertaken at the Brain Imaging Research Centre ([www.bric.ed.ac.uk](http://www.bric.ed.ac.uk)), a member of the Scottish Imaging Network A Platform for Scientific Excellence (SINAPSE) collaboration ([www.sinapse.ac.uk](http://www.sinapse.ac.uk)), at the Division of Clinical Neurosciences, University of Edinburgh. SINAPSE is funded by the Scottish Funding Council (SFC) and the Chief Scientist Office of the Scottish Executive (CSO).

Additional support was received from Chest Heart and Stroke Scotland, DesAcc, University of Edinburgh, Danderyd Hospital R&D Department, Karolinska Institutet, Oslo University Hospital, and the Dalhousie University Internal Medicine Research Fund.
